# Supplementary material
Source: MDPI journal article supplement (https://www.mdpi.com/2073-445X/13/2/143)

## Supplementary Material

Table S1

*Reclassification of Land Cover Classes According to UN-SPIDER and USDA*

| ID  | Description                                   | New ID | New Description    |
|-----|-----------------------------------------------|--------|--------------------|
| 2   | Wetland                                       | 1      | Water              |
| 61  | Lake and watercourse                          |        |                    |
| 62  | Sea                                           |        |                    |
| 121 | Pine forest on wetland                        |        |                    |
| 122 | Spruce forest on wetland                      |        |                    |
| 123 | Mixed coniferous forest on wetland            |        |                    |
| 124 | Mixed coniferous forest on wetland            |        |                    |
| 125 | Trivial deciduous forest on wetland           |        |                    |
| 126 | Deciduous forest on wetland                   |        |                    |
| 127 | Coniferous broadleaf forest on wetland        |        |                    |
| 128 | Temporary no forest on wetland                |        |                    |
| 51  | Developed land, building                      | 2      | Medium residential |
| 52  | Developed land, not building or road/railway  |        |                    |
| 53  | Developed land, road/railway                  |        |                    |
| 111 | Pine forest outside wetland                   | 3      | Forest             |
| 112 | Spruce forest outside wetland                 |        |                    |
| 113 | Mixed coniferous forest outside wetland       |        |                    |
| 114 | Mixed coniferous forest outside wetlands      |        |                    |
| 115 | Deciduous forest outside wetland              |        |                    |
| 116 | Deciduous forest outside wetland              |        |                    |
| 117 | Coniferous broadleaved forest outside wetland |        |                    |
| 118 | Temporary no forest outside wetland           |        |                    |
| 3   | Arable land                                   | 4      | Agricultural       |
| 41  | Other open land without vegetation            |        |                    |
| 42  | Other open land with vegetation               |        |                    |

Table S2

*Reclassification of Soils According to HSG*

| Soil type                                                                                                                                                                                                                                                                                                             | HSG | Description                                                                                                                          |
|-----------------------------------------------------------------------------------------------------------------------------------------------------------------------------------------------------------------------------------------------------------------------------------------------------------------------|-----|--------------------------------------------------------------------------------------------------------------------------------------|
| Glaciofluvial sand<br>Glaciofluvial sediment<br>Postglacial fine sand<br>Postglacial sand<br>Sandy till<br>Shingle<br>Silty to fine sandy till<br>Wave-washed gravel<br>Young fluvial sediment,<br>sand                                                                                                               | A   | High infiltration rate and low runoff.<br>Consists of sand, loamy sand, or sandy loam<br>types of soils.                             |
| Glacial silt<br>Silt                                                                                                                                                                                                                                                                                                  | B   | Moderate infiltration rate.<br>Consists of silt loam or loam.                                                                        |
| -                                                                                                                                                                                                                                                                                                                     | C   | Slow infiltration rate.<br>Consists of sandy clay loam.                                                                              |
| Artificial fill<br>Bog peat<br>Clay till<br>Crystalline rock<br>Fen peat<br>Glacial clay<br>Gytja clay<br>Postglacial clay<br>Postglacial clay, clay con-<br>tent >25%<br>Postglacial clay, clay con-<br>tent 15–25%<br>Till alternating with sorted<br>sediments<br>Water<br>Young fluvial sediment,<br>clay to silt | D   | Slow infiltration rate and high runoff poten-<br>tial.<br>Consists of lay loam, silty clay loam, sandy<br>clay, silty clay, or clay. |

*Note.* Adapted from NRCS (2007) and Nilsson (2018).

Figure S1

### Algorithm to automatically assign HSG's to soil types

Each “when” line checks the JG2 column in the attribute table and assigns one of the soil type identification numbers in brackets a HSG in a new column (1=A, 2=B, 3=C, 4=D). The “else ‘other’” line was used to manually check if any soil type identification number was not represented in the code.

```
case
  when "JG2" in
    ('10','13','28','31','33','34','36','50','55','57','76','93','95',
    '229','917','8809') then '1'
    when "JG2" in ('24','48','100','2306','9010') then '2'
    when "JG2" in
    ('39','86','136','214','8802','8806','8950','9060') then '3'
    when "JG2" in
    ('1','2','5','6','9','16','17','19','22','30','40','43','51','75',
    '81','85','91','92','101','116','121','200','212','215','227','3',
    '22','823','850','888','890','916','1950','8114','8175','8814','91',
    '47','9792','9794') then '4'
    else 'other'
end
```

Figure S2

*Hydrologic Soil Map (a) and Land Cover Classes (b) for the Adjoining Sub-basins*

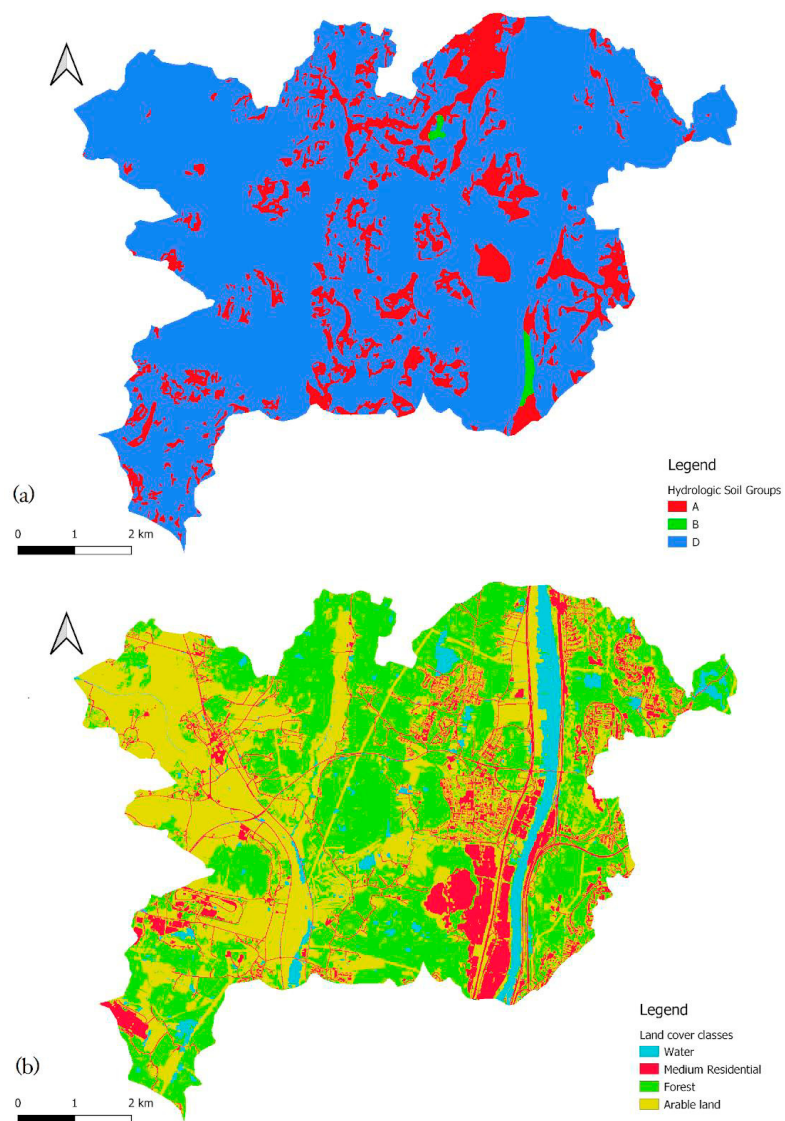

Supplement: s1 [file s1 › land-2820667-supplementary.pdf]
